# Supplementary material
Source: PubMed Central journal article supplement (PMC1413803)
Supplement: pnas_0510764103_5.pdf [file pnas_0510764103_5.pdf]

Supplementary Table 2. Microarray raw data

| <u>Probe Set ID</u> | <u>f-TAF4b(1) Signal</u> | <u>(1) Detection</u> | <u>f-TAF4b(2) Signal</u> | <u>(2) Detection</u> | <u>Flag(3) Signal</u> | <u>(3) Detection</u> | <u>Flag(4) Signal</u> | <u>(4) Detection</u> |
|---------------------|--------------------------|----------------------|--------------------------|----------------------|-----------------------|----------------------|-----------------------|----------------------|
| rc_AA858520_at      | 1207.6                   | P                    | 1250.8                   | P                    | 418                   | A                    | 751.8                 | P                    |
| rc_AI232078_at      | 897.1                    | P                    | 1131.8                   | P                    | 232.3                 | P                    | 336.4                 | P                    |
| AF022952_at         | 415.7                    | P                    | 204.2                    | A                    | 49                    | A                    | 18.3                  | A                    |
| rc_AA945867_at      | 293.5                    | P                    | 211                      | P                    | 4.9                   | A                    | 67.5                  | A                    |
| rc_AI175959_at      | 1581.7                   | P                    | 1475.1                   | P                    | 277.6                 | P                    | 422.6                 | P                    |
| X17163cds_s_at      | 565.8                    | P                    | 632                      | P                    | 108.9                 | A                    | 179                   | A                    |
| X02601_at           | 1464.3                   | P                    | 2364.7                   | P                    | 113.4                 | P                    | 300.5                 | P                    |
| L00191cds#1_s_at    | 2047.3                   | P                    | 1067.8                   | P                    | 261.2                 | P                    | 275.9                 | M                    |
| M28259cds_at        | 255.9                    | P                    | 216.7                    | M                    | 34.7                  | A                    | 22.4                  | A                    |
| rc_AA955600_at      | 340.3                    | P                    | 410.1                    | P                    | 37.6                  | A                    | 44                    | A                    |
| U82612cds_at        | 836.2                    | P                    | 656.4                    | P                    | 160.9                 | A                    | 242.7                 | A                    |
| U82612cds_g_at      | 658.2                    | P                    | 696.1                    | P                    | 105.6                 | A                    | 204.4                 | A                    |
| X05834_at           | 3400.7                   | P                    | 2286.6                   | P                    | 510.4                 | P                    | 366.2                 | P                    |
| X62952_at           | 5936.5                   | P                    | 6452.4                   | P                    | 138.9                 | P                    | 178                   | P                    |
| M14656_at           | 10262                    | P                    | 12021.4                  | P                    | 246.2                 | P                    | 427.2                 | P                    |
| AF001417_s_at       | 341.8                    | P                    | 432.2                    | P                    | 193.5                 | A                    | 123.1                 | A                    |
| M19651_at           | 673.3                    | A                    | 543.6                    | P                    | 184.1                 | A                    | 252.8                 | A                    |
| M31837_at           | 1960.6                   | P                    | 1431.8                   | P                    | 297.8                 | P                    | 231.6                 | P                    |
| rc_AI009405_s_at    | 1087.5                   | P                    | 952.9                    | P                    | 112.6                 | P                    | 16.6                  | A                    |
| D00403_g_at         | 349.1                    | P                    | 486.1                    | P                    | 86.5                  | P                    | 261.8                 | P                    |
| rc_AI030286_s_at    | 64.1                     | P                    | 50.5                     | P                    | 28.6                  | A                    | 18.7                  | A                    |
| X55183_at           | 977.2                    | P                    | 991.4                    | P                    | 294.8                 | P                    | 447.8                 | P                    |
| M31076_at           | 1985.9                   | P                    | 1704.7                   | P                    | 741.5                 | P                    | 862.5                 | P                    |
| V01227_s_at         | 4763.8                   | P                    | 3763.9                   | P                    | 500.7                 | P                    | 692.9                 | P                    |
| rc_AI180288_s_at    | 631.8                    | P                    | 1155.4                   | P                    | 141.1                 | P                    | 215.9                 | P                    |
| U95178_s_at         | 265.7                    | P                    | 125.6                    | A                    | 54.6                  | A                    | 34.5                  | A                    |
| rc_AA900505_at      | 423.7                    | P                    | 405.2                    | P                    | 177.1                 | P                    | 123.8                 | P                    |

**Note:**

Signal: a quantitative measure of the relative abundance of a transcript.

Detection: a qualitative measurement indicating if the transcript is detected (P, present), not detected (A, absent), or marginally detected (M, marginal).

## Descriptions

(Follistatin) rc\_AA858520 UI-R-E0-bt-e-06-0-UI.s1 Rattus norvegicus cDNA, 3 end /clone=UI-R-E0-bt-e-06-0-UI /clone\_end=3 /gb=AA858520 /gi=2948860 /ug=Rn.22500 /len=498

(Ltbp-1) rc\_AI232078 EST228766 Rattus norvegicus cDNA, 3 end /clone=RKIBW60 /clone\_end=3 /gb=AI232078 /ug=Rn.11340 /len=597

(Vegf-B) AF022952 Rattus norvegicus vascular endothelial growth factor B mRNA, partial cds

(c-Jun) rc\_AA945867 EST201366 Rattus norvegicus cDNA, 3 end /clone=RLUAW26 /clone\_end=3 /gb=AA945867 /gi=3105783 /ug=Rn.7672 /len=477

(c-Jun) rc\_AI175959 EST219534 Rattus norvegicus cDNA, 3 end /clone=ROVBH68 /clone\_end=3 /gb=AI175959 /ug=Rn.7672 /len=421

X17163cds RSJUNAP1 Rat c-jun oncogene mRNA for transcription factor AP-1

(Mmp-3) X02601 Rat mRNA for 53 kD polypeptide induced by growth factors (EGF) and oncogenes (H-ras; src; polyoma middle T) /cds=(57,1484) /gb=X02601 /gi=57460 /ug=Rn.10435

L00191cds#1 RATFN3M1 Rat fibronectin (cell-, heparin-, and fibrin-binding domains) gene encoding three fibronectin mRNAs, exons 1,2,3

M28259cds RATFNE2 Rat fibronectin gene, exons 2b and 3a

(Fn1) rc\_AA955600 UI-R-E1-fa-d-10-0-UI.s1 Rattus norvegicus cDNA, 3 end /clone=UI-R-E1-fa-d-10-0-UI /clone\_end=3 /gb=AA955600 /ug=Rn.1604 /len=399

U82612cds RNU82612 Rattus norvegicus fibronectin (fn-1) gene, partial cds

U82612cds RNU82612 Rattus norvegicus fibronectin (fn-1) gene, partial cds

X05834 Rat fibronectin gene 3 end /cds=(0,71) /gb=X05834 /gi=56161 /ug=Rn.1604 /len=760

X62952 R.norvegicus mRNA for vimentin /cds=(80,1480) /gb=X62952 /gi=57479 /ug=Rn.2710 /len=1796

M14656 Rat osteopontin mRNA, complete cds /cds=(79,1032) /gb=M14656 /gi=205859 /ug=Rn.8871 /len=1457

AF001417 Rattus norvegicus zinc finger protein mRNA, complete cds

M19651 Rat fos-related antigen (Fra-1) mRNA, complete cds /cds=(225,1052) /gb=M19651 /gi=204174 /ug=Rn.11306 /len=1663

M31837 Rat insulin-like growth factor-binding protein (IGF-BP3) mRNA, complete cds /cds=(56,934) /gb=M31837 /gi=204741 /ug=Rn.1710 /len=2352

(IGF-BP-3) rc\_AI009405 EST203856 Rattus norvegicus cDNA, 3 end /clone=RHEBJ56 /clone\_end=3 /gb=AI009405 /ug=Rn.1710 /len=501

D00403 RATIL1A Rat interleukin-1 alpha mRNA, complete cds

(BDNF) rc\_AI030286 UI-R-C0-jb-c-02-0-UI.s1 Rattus norvegicus cDNA, 3 end /clone=UI-R-C0-jb-c-02-0-UI /clone\_end=3 /gb=AI030286 /ug=Rn.11266 /len=367

(amphiregulin) X55183 R.norvegicus mRNA for schwannoma-derived growth factor /cds=(175,906) /gb=X55183 /gi=49595 /ug=Rn.10568 /len=1154

M31076 Rat transforming growth factor alpha (TGF-alpha) mRNA, complete cds, clone 22A1/22A3 /cds=(144,623) /gb=M31076 /gi=207281 /ug=Rn.9952 /len=4207

V01227 Rat mRNA encoding alpha-tubulin /cds=(66,1421) /gb=V01227 /gi=55776 /ug=Rn.3389 /len=1617

(caldesmon 1)rc\_AI180288 EST224031 Rattus norvegicus cDNA, 3 end /clone=RSPCS84 /clone\_end=3 /gb=AI180288 /ug=Rn.10621 /len=417

U95178 Rattus norvegicus DOC-2 p59 isoform mRNA, complete cds /cds=(6,1658) /gb=U95178 /gi=3157994 /ug=Rn.14763 /len=2504

(RhoB) rc\_AA900505 UI-R-E0-dl-b-07-0-UI.s1 Rattus norvegicus cDNA, 3 end /clone=UI-R-E0-dl-b-07-0-UI /clone\_end=3 /gb=AA900505 /gi=3035859 /ug=Rn.2042 /len=595
