# Supplementary material
Source: PubMed Central journal article supplement (PMC1413803)
Supplement: pnas_0510764103_6.pdf [file pnas_0510764103_6.pdf]

Supplementary Table 3. Microarray processed data

| Probe Set ID     | f-TAF4b(1)/Flag(3) |        | f-TAF4b(1)/Flag(4) |        | f-TAF4b(2)/Flag(3) |        | f-TAF4b(2)/Flag(4) |        | Average Signal Log Ratio | Average FoldChange |
|------------------|--------------------|--------|--------------------|--------|--------------------|--------|--------------------|--------|--------------------------|--------------------|
|                  | Signal Log Ratio   | Change |                          |                    |
| rc_AA858520_at   | 1.68               | I      | 0.83               | I      | 1.85               | I      | 0.97               | I      | 1.33                     | 2.52               |
| rc_AI232078_at   | 2.37               | I      | 2.05               | I      | 2.1                | I      | 1.97               | I      | 2.12                     | 4.35               |
| AF022952_at      | 2.54               | I      | 3.82               | I      | 1.61               | I      | 2.72               | I      | 2.67                     | 6.38               |
| rc_AA945867_at   | 4.76               | I      | 1.94               | I      | 3.77               | I      | 1.44               | I      | 2.98                     | 7.88               |
| rc_AI175959_at   | 2.54               | I      | 2.13               | I      | 2.28               | I      | 1.94               | I      | 2.22                     | 4.67               |
| X17163cds_s_at   | 2.4                | I      | 1.48               | I      | 2.1                | I      | 1.44               | I      | 1.86                     | 3.62               |
| X02601_at        | 3.27               | I      | 2.6                | I      | 3.84               | I      | 3.13               | I      | 3.21                     | 9.25               |
| L00191cds#1_s_   | 2.98               | I      | 2.78               | I      | 2.14               | I      | 1.9                | I      | 2.45                     | 5.46               |
| M28259cds_at     | 3.24               | I      | 3.83               | I      | 2.91               | I      | 3.9                | I      | 3.47                     | 11.08              |
| rc_AA955600_at   | 2.36               | I      | 1.76               | I      | 2.43               | I      | 1.99               | I      | 2.14                     | 4.39               |
| U82612cds_at     | 2.21               | I      | 1.67               | I      | 1.88               | I      | 1.3                | I      | 1.77                     | 3.40               |
| U82612cds_g_at   | 2.73               | I      | 1.9                | I      | 2.56               | I      | 1.97               | I      | 2.29                     | 4.89               |
| X05834_at        | 3.01               | I      | 3.05               | I      | 2.01               | I      | 2.31               | I      | 2.60                     | 6.04               |
| X62952_at        | 4.61               | I      | 4.44               | I      | 4.53               | I      | 4.42               | I      | 4.50                     | 22.63              |
| M14656_at        | 5.52               | I      | 4.79               | I      | 5.69               | I      | 5.03               | I      | 5.26                     | 38.25              |
| AF001417_s_at    | 0.81               | I      | 1.69               | I      | 1.16               | I      | 1.72               | I      | 1.35                     | 2.54               |
| M19651_at        | 1.45               | I      | 1.17               | I      | 1.51               | I      | 1.2                | I      | 1.33                     | 2.52               |
| M31837_at        | 2.44               | I      | 2.74               | I      | 2.47               | I      | 2.77               | I      | 2.61                     | 6.08               |
| rc_AI009405_s_at | 3                  | I      | 4.88               | I      | 2.57               | I      | 4.45               | I      | 3.73                     | 13.22              |
| D00403_g_at      | 2.18               | I      | 0.7                | I      | 2.78               | I      | 1.2                | I      | 1.72                     | 3.28               |
| rc_AI030286_s_at | 1.25               | I      | 2.19               | I      | 1.13               | I      | 2.03               | I      | 1.65                     | 3.14               |
| X55183_at        | 1.64               | I      | 1.08               | I      | 1.91               | I      | 1.28               | I      | 1.48                     | 2.78               |
| M31076_at        | 1.38               | I      | 1.04               | I      | 1.43               | I      | 1.15               | I      | 1.25                     | 2.38               |
| V01227_s_at      | 3.25               | I      | 2.57               | I      | 3.12               | I      | 2.54               | I      | 2.87                     | 7.31               |
| rc_AI180288_s_at | 1.88               | I      | 1.74               | I      | 2.51               | I      | 2.25               | I      | 2.10                     | 4.27               |
| U95178_s_at      | 2.12               | I      | 2.71               | I      | 1.16               | I      | 1.7                | I      | 1.92                     | 3.79               |
| rc_AA900505_at   | 1.54               | I      | 1.73               | I      | 1.34               | I      | 1.25               | I      | 1.47                     | 2.76               |

**NOTE:**

Signal Log Ratio = Change in gene expression for a transcript between the baseline (flag control cells) and the experiment array (f-TAF4b cells). This change is expressed as the log2 ratio.  
Change = A qualitative call indicating an Increase (I) in transcript level between a baseline array (flag control cells) and the experiment array (f-TAF4b cells).

## **Descriptions**

rc\_AA858520 UI-R-E0-bt-e-06-0-UI.s1 Rattus norvegicus cDNA, 3 end /clone=UI-R-E0-bt-e-06-0-UI /clone\_end=3 /gb=AA858520 /gi=2948860 /ug=Rn.22500 /len=498

rc\_AI232078 EST228766 Rattus norvegicus cDNA, 3 end /clone=RKIBW60 /clone\_end=3 /gb=AI232078 /ug=Rn.11340 /len=597

AF022952 Rattus norvegicus vascular endothelial growth factor B mRNA, partial cds

rc\_AA945867 EST201366 Rattus norvegicus cDNA, 3 end /clone=RLUAW26 /clone\_end=3 /gb=AA945867 /gi=3105783 /ug=Rn.7672 /len=477

rc\_AI175959 EST219534 Rattus norvegicus cDNA, 3 end /clone=ROVBH68 /clone\_end=3 /gb=AI175959 /ug=Rn.7672 /len=421

X17163cds RSJUNAP1 Rat c-jun oncogene mRNA for transcription factor AP-1

X02601 Rat mRNA for 53 kD polypeptide induced by growth factors (EGF) and oncogenes (H-ras; src; polyoma middle T) /cds=(57,1484) /gb=X02601 /gi=57460 /ug=Rn.10435 /len=1771

L00191cds#1 RATFN3M1 Rat fibronectin (cell-, heparin-, and fibrin-binding domains) gene encoding three fibronectin mRNAs, exons 1,2,3

M28259cds RATFNE2 Rat fibronectin gene, exons 2b and 3a

rc\_AA955600 UI-R-E1-fa-d-10-0-UI.s1 Rattus norvegicus cDNA, 3 end /clone=UI-R-E1-fa-d-10-0-UI /clone\_end=3 /gb=AA955600 /ug=Rn.1604 /len=399

U82612cds RNU82612 Rattus norvegicus fibronectin (fn-1) gene, partial cds

U82612cds RNU82612 Rattus norvegicus fibronectin (fn-1) gene, partial cds

X05834 Rat fibronectin gene 3 end /cds=(0,71) /gb=X05834 /gi=56161 /ug=Rn.1604 /len=760

X62952 R.norvegicus mRNA for vimentin /cds=(80,1480) /gb=X62952 /gi=57479 /ug=Rn.2710 /len=1796

M14656 Rat osteopontin mRNA, complete cds /cds=(79,1032) /gb=M14656 /gi=205859 /ug=Rn.8871 /len=1457

AF001417 Rattus norvegicus zinc finger protein mRNA, complete cds

M19651 Rat fos-related antigen (Fra-1) mRNA, complete cds /cds=(225,1052) /gb=M19651 /gi=204174 /ug=Rn.11306 /len=1663

M31837 Rat insulin-like growth factor-binding protein (IGF-BP3) mRNA, complete cds /cds=(56,934) /gb=M31837 /gi=204741 /ug=Rn.1710 /len=2352

rc\_AI009405 EST203856 Rattus norvegicus cDNA, 3 end /clone=RHEBJ56 /clone\_end=3 /gb=AI009405 /ug=Rn.1710 /len=501

D00403 RATIL1A Rat interleukin-1 alpha mRNA, complete cds

rc\_AI030286 UI-R-C0-jb-c-02-0-UI.s1 Rattus norvegicus cDNA, 3 end /clone=UI-R-C0-jb-c-02-0-UI /clone\_end=3 /gb=AI030286 /ug=Rn.11266 /len=367

X55183 R.norvegicus mRNA for schwannoma-derived growth factor /cds=(175,906) /gb=X55183 /gi=49595 /ug=Rn.10568 /len=1154

M31076 Rat transforming growth factor alpha (TGF-alpha) mRNA, complete cds, clone 22A1/22A3 /cds=(144,623) /gb=M31076 /gi=207281 /ug=Rn.9952 /len=4207

V01227 Rat mRNA encoding alpha-tubulin /cds=(66,1421) /gb=V01227 /gi=55776 /ug=Rn.3389 /len=1617

rc\_AI180288 EST224031 Rattus norvegicus cDNA, 3 end /clone=RSPCS84 /clone\_end=3 /gb=AI180288 /ug=Rn.10621 /len=417

U95178 Rattus norvegicus DOC-2 p59 isoform mRNA, complete cds /cds=(6,1658) /gb=U95178 /gi=3157994 /ug=Rn.14763 /len=2504

rc\_AA900505 UI-R-E0-dl-b-07-0-UI.s1 Rattus norvegicus cDNA, 3 end /clone=UI-R-E0-dl-b-07-0-UI /clone\_end=3 /gb=AA900505 /gi=3035859 /ug=Rn.2042 /len=595
